# Supplementary material for: Screening of Human Circular RNAs as Biomarkers for Early Onset Detection of Alzheimer’s Disease
Source: PubMed Central journal article supplement (PMC9296062; doi:10.3389/fnins.2022.878287), 2022-07-05
Supplement: Image_1.pdf [file Image_1.pdf]

| 2D Structure                                                                                                                                | Local AU                       | Position | Conservation             | Predicted By |
|---------------------------------------------------------------------------------------------------------------------------------------------|--------------------------------|----------|--------------------------|--------------|
| <p>675 7mer-m8 696</p> <p>5'-tccccAAGTCCACTTCCTTC-3' UTR</p> <p>3'-auuuacUUAAGUUAAGGAAGA-5' miRNA</p> <p>3'pairing Seed</p>                 | <p>TTCCTTC<br/>7mer-m8</p>     |          | <input type="checkbox"/> |              |
| <p>1630 Offset 6mer 1651</p> <p>5'-catttcctTTCAGTTTCCTTT-3' UTR</p> <p>3'-auuuacuuAAGUUAAGGAAGA-5' miRNA</p> <p>3'pairing Seed</p>          | <p>TTCCTTC<br/>Offset 6mer</p> |          | <input type="checkbox"/> |              |
| <p>4113 Imperfect match 4133</p> <p>5'-cccAAGAATT-ACCTTCCTTC-3' UTR</p> <p>3'-auUACUUAAGUUAAGGAAGA-5' miRNA</p> <p>3'pairing Seed</p>       | <p>TTCCTTC<br/>Imperfect</p>   |          | <input type="checkbox"/> |              |
| <p>4536 Imperfect match 4559</p> <p>5'-gacATGATTCATCCATTCCTTC-3' UTR</p> <p>3'-auUACUUAAGU--UAAAGGAAGA-5' miRNA</p> <p>3'pairing Seed</p>   | <p>TTCCTTC<br/>Imperfect</p>   |          | <input type="checkbox"/> |              |
| <p>4993 Imperfect match 5015</p> <p>5'-ttttAAATCTTATTTTCCTTC-3' UTR</p> <p>3'-auuuACUUA-AGUUAAGGAAGA-5' miRNA</p> <p>3'pairing Seed</p>     | <p>TTCCTTC<br/>Imperfect</p>   |          | <input type="checkbox"/> |              |
| <p>5467 Offset 6mer 5487</p> <p>5'-acATTTAATAC-ATTCCTTTA-3' UTR</p> <p>3'-auUUACUUAAGUUAAGGAAGA-5' miRNA</p> <p>3'pairing Seed</p>          | <p>TTCCTTC<br/>Offset 6mer</p> |          | <input type="checkbox"/> |              |
| <p>5599 Offset 6mer 5623</p> <p>5'-taATGTCAAAATGTTTCCTTTA-3' UTR</p> <p>3'-auUUAC--UUAAGUUAAGGAAGA-5' miRNA</p> <p>3'pairing Seed</p>       | <p>TTCCTTC<br/>Offset 6mer</p> |          | <input type="checkbox"/> |              |
| <p>6190 Offset 6mer 6210</p> <p>5'-caAAT-ACTTTAATTCCTTT-3' UTR</p> <p>3'-auUUACUUAAGUUAAGGAAGA-5' miRNA</p> <p>3'pairing Seed</p>           | <p>TTCCTTC<br/>Offset 6mer</p> |          | <input type="checkbox"/> |              |
| <p>6268 Offset 6mer 6290</p> <p>5'-taAATAATTCGGTTTCCTTC-3' UTR</p> <p>3'-auUUACUUAAG-UUAAAGGAAGA-5' miRNA</p> <p>3'pairing Seed</p>         | <p>TTCCTTC<br/>Offset 6mer</p> |          | <input type="checkbox"/> |              |
| <p>6446 7mer-m8 6469</p> <p>5'-acAATGAATATTAATTCCTTC-3' UTR</p> <p>3'-auUUAC-UUA-AGUUAAGGAAGA-5' miRNA</p> <p>3'pairing Seed</p>            | <p>TTCCTTC<br/>7mer-m8</p>     |          | <input type="checkbox"/> |              |
| <p>7483 Offset 6mer 7503</p> <p>5'-tgAGTGAG--CGATTTTCCTTTA-3' UTR</p> <p>3'-auUUACUUAAGUU-AAAGGAAGA-5' miRNA</p> <p>3'pairing Seed</p>      | <p>TTCCTTC<br/>Offset 6mer</p> |          | <input type="checkbox"/> |              |
| <p>8445 Imperfect match 8464</p> <p>5'-aaATGCCTTT--TTTCCTTC-3' UTR</p> <p>3'-auUUACUUAAGUUAAGGAAGA-5' miRNA</p> <p>3'pairing Seed</p>       | <p>TTCCTTC<br/>Imperfect</p>   |          | <input type="checkbox"/> |              |
| <p>8598 Imperfect match 8620</p> <p>5'-taAAAGAA-ACAATTTTCCTTCa-3' UTR</p> <p>3'-auUUACUUAAGUU--AAAGGAAGA-5' miRNA</p> <p>3'pairing Seed</p> | <p>TTCCTTC<br/>Imperfect</p>   |          | <input type="checkbox"/> |              |
| <p>9295 Imperfect match 9317</p> <p>5'-tctcTGACTTCAGCTTCCTTC-3' UTR</p> <p>3'-auuuAC-UUAAGUUAAGGAAGA-5' miRNA</p> <p>3'pairing Seed</p>     | <p>TTCCTTC<br/>Imperfect</p>   |          | <input type="checkbox"/> |              |
| <p>10658 Imperfect match 10680</p> <p>5'-tgAAGGTGTTAGTTTCCTTCa-3' UTR</p> <p>3'-auUUACUUAAGUU-AAAGGAAGA-5' miRNA</p> <p>3'pairing Seed</p>  | <p>TTCCTTC<br/>Imperfect</p>   |          | <input type="checkbox"/> |              |

Figure 1: The binding sites of hsa\_circRNA\_001481 with hsa-miR-1252-5p, are shown in 2D structure interactions

| 2D Structure                                                                                                                  | Local AU | Position | Conservation             | Predicted By |
|-------------------------------------------------------------------------------------------------------------------------------|----------|----------|--------------------------|--------------|
| 779 Offset 6mer 802<br>5'-tgaaTTTCTTTATTTATCTCTCTa-3' UTR<br>3'-gaagACAAGAGA-AAAGAGAGAGGu-5' miRNA<br>3'pairing Seed          |          |          | <input type="checkbox"/> | (M)          |
| 1496 8mer 1519<br>5'-taTTTATATATCTTGGTCTCTCCa-3' UTR<br>3'-gaAGACAGAGA-AAAGAGAGAGGu-5' miRNA<br>3'pairing Seed                |          |          | <input type="checkbox"/> | (M) (T)      |
| 1564 Imperfect match 1589<br>5'-atTCTTTCTTAACTTTTTCCCTCCa-3' UTR<br>3'-gaAGACAGAGA--GAAAAGAGAGAGGu-5' miRNA<br>3'pairing Seed |          |          | <input type="checkbox"/> | (M)          |
| 1698 Offset 6mer 1720<br>5'-ctcCTCTTTCCTTAATCTCTCT-3' UTR<br>3'-gaaGACAGAGA-AAAGAGAGAGGu-5' miRNA<br>3'pairing Seed           |          |          | <input type="checkbox"/> | (M)          |
| 1733 Imperfect match 1754<br>5'-ttTCTGTC-CTTTCTCCCTCCc-3' UTR<br>3'-gaAGACAGAGA-AAAGAGAGAGGu-5' miRNA<br>3'pairing Seed       |          |          | <input type="checkbox"/> | (M)          |
| 2314 Imperfect match 2336<br>5'-acatttaCTTTTTTTCTTTTct-3' UTR<br>3'-gaagacaGAGA-AAAGAGAGAGGu-5' miRNA<br>3'pairing Seed       |          |          | <input type="checkbox"/> | (M)          |
| 5011 Imperfect match 5033<br>5'-ttTCTTACGCTGTTCTCTTCTg-3' UTR<br>3'-gaAGACAGAGA-AAAGAGAGAGGu-5' miRNA<br>3'pairing Seed       |          |          | <input type="checkbox"/> | (M)          |
| 6275 Imperfect match 6299<br>5'-ttTCTGTTTCCTTTCTTCTCCCa-3' UTR<br>3'-gaAGA-CAGAGA-AAAG-AGAGAGGu-5' miRNA<br>3'pairing Seed    |          |          | <input type="checkbox"/> | (M)          |
| 8445 Imperfect match 8469<br>5'-aaaaTGCCTTTTTTCTTTCTCTTc-3' UTR<br>3'-gaagACAGAGAAAAG--AGAGAGGu-5' miRNA<br>3'pairing Seed    |          |          | <input type="checkbox"/> | (M)          |
| 8763 Imperfect match 8784<br>5'-cttacGTC-CTGTATTCTTTCCt-3' UTR<br>3'-gaagaCAGAGA-AAAGAGAGAGGu-5' miRNA<br>3'pairing Seed      |          |          | <input type="checkbox"/> | (M)          |
| 10230 7mer-m8 10252<br>5'-tggagggaTTGTATCTCTCCc-3' UTR<br>3'-gaagacagagAAAAGAGAGAGGu-5' miRNA<br>3'pairing Seed               |          |          | <input type="checkbox"/> | (M) (T)      |
| 10301 Imperfect match 10323<br>5'-gaTTTGAACCTTTTAACTTTTCCt-3' UTR<br>3'-gaAGACAGAGA-AAAGAGAGAGGu-5' miRNA<br>3'pairing Seed   |          |          | <input type="checkbox"/> | (M)          |

Figure 2: The binding sites of hsa\_circRNA\_001481 with hsa-miR-4644 along with predicted tool and Local AU

| 2D Structure                                                                                                                            | Local AU | Position | Conservation             | Predicted By |
|-----------------------------------------------------------------------------------------------------------------------------------------|----------|----------|--------------------------|--------------|
| <p>Imperfect match</p> <p>397 5'-taATAACTTGAATTATCTTTa-3' UTR</p> <p>3'-guUUUUGGUUUUAUGGAAAc-5' miRNA</p> <p>3' pairing Seed</p>        |          |          | <input type="checkbox"/> |              |
| <p>Imperfect match</p> <p>2672 5'-taAGAAGAATAATTATCTTTt-3' UTR</p> <p>3'-guUUUUGGUUUUAUGGAAAc-5' miRNA</p> <p>3' pairing Seed</p>       |          |          | <input type="checkbox"/> |              |
| <p>Imperfect match</p> <p>5266 5'-caAAAAGGAACAATACTTTTg-3' UTR</p> <p>3'-guUUUUGGUUUUAUGGAAAc-5' miRNA</p> <p>3' pairing Seed</p>       |          |          | <input type="checkbox"/> |              |
| <p>Imperfect match</p> <p>5747 5'-ctaAGATGATTATACTTTTg-3' UTR</p> <p>3'-guUUUUGGUUUUAUGGAAAc-5' miRNA</p> <p>3' pairing Seed</p>        |          |          | <input type="checkbox"/> |              |
| <p>Imperfect match</p> <p>6182 5'-agAGAAGC-CAATACTTTTa-3' UTR</p> <p>3'-guUUUUGGUUUUAUGGAAAc-5' miRNA</p> <p>3' pairing Seed</p>        |          |          | <input type="checkbox"/> |              |
| <p>Imperfect match</p> <p>6935 5'-acttGAGCACAAAGTGCCTTTt-3' UTR</p> <p>3'-guuuUGGUUUUAUGGAAAc-5' miRNA</p> <p>3' pairing Seed</p>       |          |          | <input type="checkbox"/> |              |
| <p>Imperfect match</p> <p>7799 5'-cacAAACTTTAATATGCCTTTc-3' UTR</p> <p>3'-guuuUGGUUUUAUGGAAAc-5' miRNA</p> <p>3' pairing Seed</p>       |          |          | <input type="checkbox"/> |              |
| <p>Imperfect match</p> <p>7863 5'-gaAAAACATGTCATGATCTTTt-3' UTR</p> <p>3'-guUUUUGGU---GUUUUAUGGAAAc-5' miRNA</p> <p>3' pairing Seed</p> |          |          | <input type="checkbox"/> |              |
| <p>Imperfect match</p> <p>8436 5'-ttAGTATTAATAATGCCTTTt-3' UTR</p> <p>3'-guUUUUGGUUUUAUGGAAAc-5' miRNA</p> <p>3' pairing Seed</p>       |          |          | <input type="checkbox"/> |              |

Figure 3: The binding sites of hsa\_circRNA\_001481 with hsa-miR-548m are presented.

| 2D Structure                                                                                                               | Local AU | Position | Conservation             | Predicted By                                                                |
|----------------------------------------------------------------------------------------------------------------------------|----------|----------|--------------------------|-----------------------------------------------------------------------------|
| 780 7mer-A1 802<br>5'-gaATTTCTTTATTTATCTCTCTa-3' UTR<br>3'-ugUAGUGUAGGAAGGGGAGAGAu-5' miRNA<br>3'pairing Seed              |          |          | <input type="checkbox"/> | <input checked="" type="checkbox"/> M <input checked="" type="checkbox"/> T |
| 1683 Imperfect match 1707<br>5'-ccATC-TGCCCTTCCCTCTCTTc-3' UTR<br>3'-ugUAGUGUAGGAAGG--GGAGAGAu-5' miRNA<br>3'pairing Seed  |          |          | <input type="checkbox"/> | <input checked="" type="checkbox"/> M                                       |
| 1698 6mer 1720<br>5'-ctcctcttTCCTTAATCTCTCT-3' UTR<br>3'-uguaguguAGGAAGGGGAGAGAu-5' miRNA<br>3'pairing Seed                |          |          | <input type="checkbox"/> | <input checked="" type="checkbox"/> M                                       |
| 1714 Imperfect match 1736<br>5'-ctcTCTTTTCCTTCCCTTTTc-3' UTR<br>3'-uguAGUGUAGGAAGGGGAGAGAu-5' miRNA<br>3'pairing Seed      |          |          | <input type="checkbox"/> | <input checked="" type="checkbox"/> M                                       |
| 1795 Imperfect match 1819<br>5'-tccTTCCTTTTTCTCTCCCTTTTc-3' UTR<br>3'-uguAGUGUAGGAAG--GGGAGAGAu-5' miRNA<br>3'pairing Seed |          |          | <input type="checkbox"/> | <input checked="" type="checkbox"/> M                                       |
| 2315 Imperfect match 2337<br>5'-catTTACTTTTTTTCTTTTCTa-3' UTR<br>3'-uguAGUGUAGGAAGGGGAGAGAu-5' miRNA<br>3'pairing Seed     |          |          | <input type="checkbox"/> | <input checked="" type="checkbox"/> M                                       |
| 6269 Imperfect match 6292<br>5'-aaATAATTTCTGGTTTCCTTTCTt-3' UTR<br>3'-ugUAGUGUAGG-AAGGGGAGAGAu-5' miRNA<br>3'pairing Seed  |          |          | <input type="checkbox"/> | <input checked="" type="checkbox"/> M                                       |
| 8468 Imperfect match 8488<br>5'-ccccCACCACC--CCCCTCTTTt-3' UTR<br>3'-guaGUGUAGGAAGGGGAGAGAu-5' miRNA<br>3'pairing Seed     |          |          | <input type="checkbox"/> | <input checked="" type="checkbox"/> M                                       |
| 9278 Imperfect match 9300<br>5'-cacTTACTACCTGCACTTCTCTg-3' UTR<br>3'-uguAGUGUAGGAAGGGGAGAGAu-5' miRNA<br>3'pairing Seed    |          |          | <input type="checkbox"/> | <input checked="" type="checkbox"/> M                                       |

**Figure 4:** The binding sites of hsa\_circRNA\_001481 with miRNA (hsa-miR-6758-5p) response elements (MRE)

| 2D Structure                                                                                                                                                                                                                                                             | Local AU | Position | Conservation             | Predicted By                                                                                                                                                      |
|--------------------------------------------------------------------------------------------------------------------------------------------------------------------------------------------------------------------------------------------------------------------------|----------|----------|--------------------------|-------------------------------------------------------------------------------------------------------------------------------------------------------------------|
| <p>668 5'-ttTGTATCC<sup>10</sup>CCCAAGTCCACTT<sup>15</sup>CCTTCC<sup>20</sup>-3' UTR<br/> 3'-agGACA-AGA<sup>10</sup>G--UCGGG-GAAGGGAGG<sup>15</sup>a-5' miRNA<br/> 3'pairing 3'pairing 3'pairing 3'pairing 3'pairing 3'pairing<br/> Imperfect match<br/> Seed</p>        |          |          | <input type="checkbox"/> | <span style="border: 1px solid green; border-radius: 50%; padding: 2px;">M</span>                                                                                 |
| <p>1565 5'-ttCT-TTCTTAAC<sup>10</sup>TTTTT<sup>15</sup>CCCTCC<sup>20</sup>a-3' UTR<br/> 3'-agGACAAGA<sup>10</sup>GUCG-GGGAAGGGAGG<sup>15</sup>a-5' miRNA<br/> 3'pairing 3'pairing 3'pairing 3'pairing 3'pairing 3'pairing<br/> 8mer<br/> Seed</p>                        |          |          | <input type="checkbox"/> | <span style="border: 1px solid green; border-radius: 50%; padding: 2px;">M</span> <span style="border: 1px solid red; border-radius: 50%; padding: 2px;">T</span> |
| <p>1655 5'-tatgcaTTTCA--TTTT<sup>10</sup>CCCTCC<sup>15</sup>c-3' UTR<br/> 3'-aggacaAGA<sup>10</sup>GUCGCGGAA<sup>15</sup>GGGAGG<sup>20</sup>a-5' miRNA<br/> 3'pairing 3'pairing 3'pairing 3'pairing 3'pairing 3'pairing<br/> 7mer-m8<br/> Seed</p>                       |          |          | <input type="checkbox"/> | <span style="border: 1px solid green; border-radius: 50%; padding: 2px;">M</span> <span style="border: 1px solid red; border-radius: 50%; padding: 2px;">T</span> |
| <p>1676 5'-ccCTGCCCATCTGC<sup>10</sup>CCTTCC<sup>15</sup>CTCt-3' UTR<br/> 3'-agGACAAG--AGUCG<sup>10</sup>GGGAAGGGAGG<sup>15</sup>a-5' miRNA<br/> 3'pairing 3'pairing 3'pairing 3'pairing 3'pairing 3'pairing<br/> 6mer<br/> Seed</p>                                     |          |          | <input type="checkbox"/> | <span style="border: 1px solid green; border-radius: 50%; padding: 2px;">M</span>                                                                                 |
| <p>1728 5'-ccCT-TTTTCTGT<sup>10</sup>CTTCTT<sup>15</sup>CCCTCC<sup>20</sup>c-3' UTR<br/> 3'-agGACAAGA<sup>10</sup>GUCGGG--GAAAGGGAGG<sup>15</sup>a-5' miRNA<br/> 3'pairing 3'pairing 3'pairing 3'pairing 3'pairing 3'pairing<br/> 7mer-m8<br/> Seed</p>                  |          |          | <input type="checkbox"/> | <span style="border: 1px solid green; border-radius: 50%; padding: 2px;">M</span> <span style="border: 1px solid red; border-radius: 50%; padding: 2px;">T</span> |
| <p>1758 5'-ttTTGAGTTCA<sup>10</sup>TTTCCTT<sup>15</sup>CCTTCC<sup>20</sup>-3' UTR<br/> 3'-agGACAAGA<sup>10</sup>GUCGGGAA<sup>15</sup>GGGAGG<sup>20</sup>a-5' miRNA<br/> 3'pairing 3'pairing 3'pairing 3'pairing 3'pairing 3'pairing<br/> Imperfect match<br/> Seed</p>   |          |          | <input type="checkbox"/> | <span style="border: 1px solid green; border-radius: 50%; padding: 2px;">M</span>                                                                                 |
| <p>1778 5'-ttcccTTCC<sup>10</sup>TGCCCTCCTT<sup>15</sup>CCTTCC<sup>20</sup>t-3' UTR<br/> 3'-aggacAAGA<sup>10</sup>GUCGGGAA<sup>15</sup>GGGAGG<sup>20</sup>a-5' miRNA<br/> 3'pairing 3'pairing 3'pairing 3'pairing 3'pairing 3'pairing<br/> Imperfect match<br/> Seed</p> |          |          | <input type="checkbox"/> | <span style="border: 1px solid green; border-radius: 50%; padding: 2px;">M</span>                                                                                 |
| <p>4537 5'-acaTGATTCA-TCCATT<sup>10</sup>CTTTCC<sup>15</sup>c-3' UTR<br/> 3'-aggACAAGA<sup>10</sup>GUCGGGAA<sup>15</sup>GGGAGG<sup>20</sup>a-5' miRNA<br/> 3'pairing 3'pairing 3'pairing 3'pairing 3'pairing 3'pairing<br/> Imperfect match<br/> Seed</p>                |          |          | <input type="checkbox"/> | <span style="border: 1px solid green; border-radius: 50%; padding: 2px;">M</span>                                                                                 |

Figure 5: The binding sites of hsa\_circRNA\_001481 with hsa-miR-6797-5p response elements

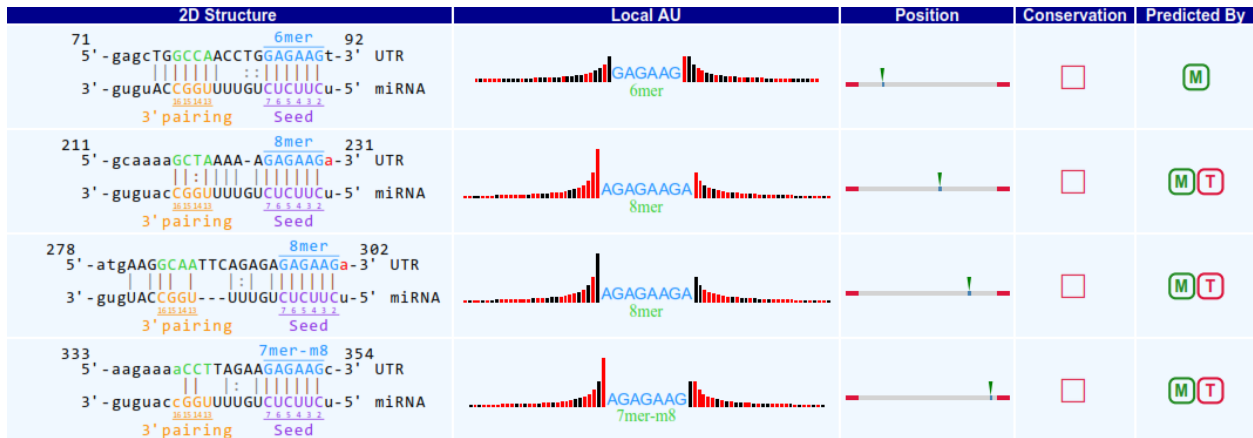

Figure 6: The binding interactions of hsa\_circRNA\_000479 with hsa-miR-942-5p response elements

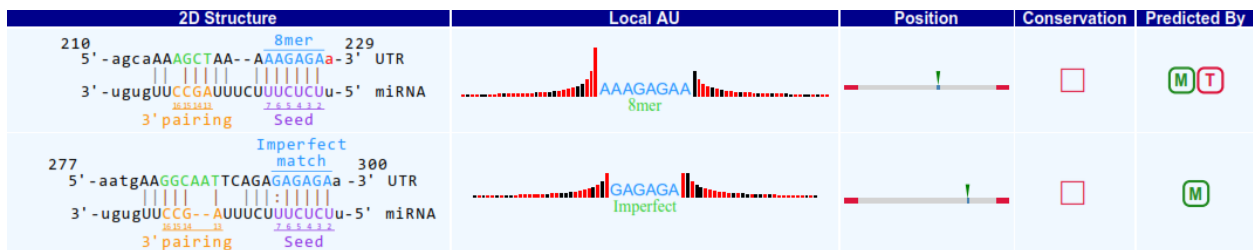

Figure 7: The binding interactions of hsa\_circRNA\_000479 with hsa-miR-4753-3p response elements

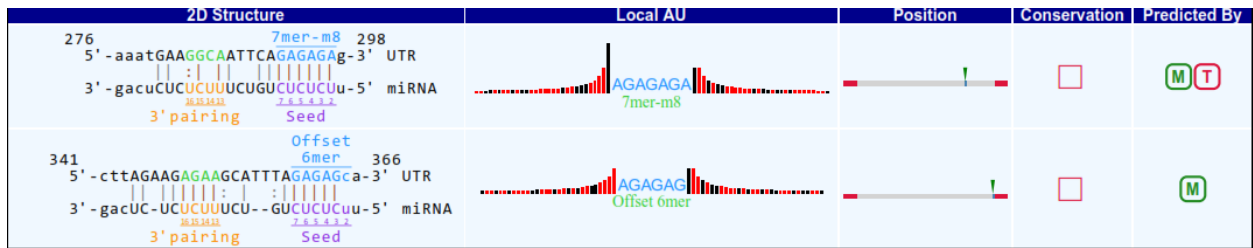

Figure 8: The binding interactions of hsa\_circRNA\_000479 with hsa-miR-6873-3p response element

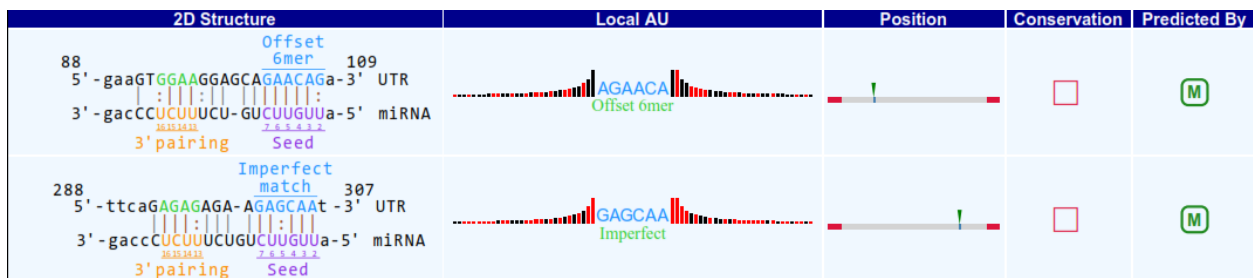

Figure 9: The binding interactions of hsa\_circRNA\_000479 with hsa-miR-6739-3p response element

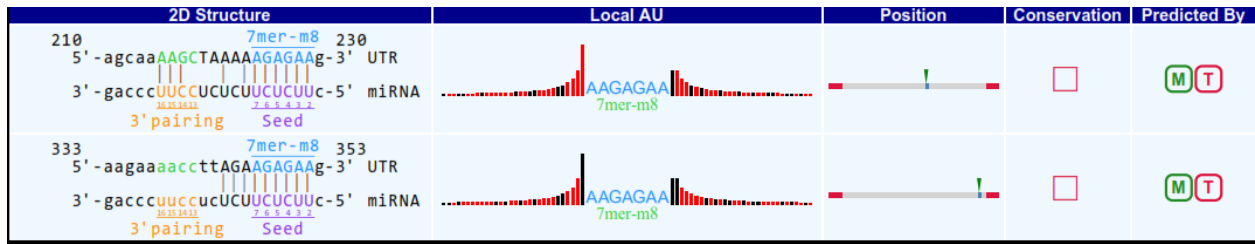

**Figure 10:** The binding interactions of hsa\_circRNA\_000479 with hsa-miR-6809-3p response element
